# Supplementary material for: Chlorinated, brominated, and perfluorinated compounds, polycyclic aromatic hydrocarbons and trace elements in livers of sea otters from California, Washington, and Alaska (USA), and Kamchatka (Russia)
Source: Royal Society of Chemistry journal article supplement (doi:10.1039/b718596k), 2008-01-01
Supplement: b718596k.pdf [file b718596k.pdf]

Supporting Information

**Chlorinated, brominated, and perfluorinated compounds, polycyclic aromatic hydrocarbons and trace elements in livers of sea otters from California, Washington, and Alaska (USA), and Kamchatka (Russia)**

**Kurunthachalam Kannan<sup>a,\*</sup>, Hyo-Bang Moon<sup>a,b</sup>, Se Hun Yun<sup>a</sup>, Tetsuro Agusa<sup>c</sup>,  
Nancy J. Thomas<sup>d</sup> and Shinsuke Tanabe<sup>c</sup>**

*<sup>a</sup>Wadsworth Center, New York State Department of Health and Department of Environmental Health Sciences, School of Public Health, State University of New York at Albany, Empire State Plaza, P.O. Box 509, Albany, New York 12201-0509, USA*

*<sup>b</sup>Marine Environmental Research Team, National Fisheries Research & Development Institute, 408-1, Sirang-ri, Gijang-eup, Gijang-gun, Busan 619-705, Korea*

*<sup>c</sup>Center for Marine Environmental Studies (CMES), Ehime University, Bunkyo-cho 2-5, Matsuyama 790-8577, Japan*

*<sup>d</sup>US Geological Survey-Biological Resources Division, National Wildlife Health Center, 6006 Schroeder Road, Madison, WI 53711-6223, USA*

\*Corresponding author address: K. Kannan  
Wadsworth Center, New York State Department of Health

Empire State Plaza, PO Box 509

Albany, NY 12201-0509

USA

Tel: 518-474-0015

Fax: 518-473-2895

E-mail: [kkannan@wadsworth.org](mailto:kkannan@wadsworth.org)

For submission to: Journal of Environmental Monitoring



Table S2. Concentrations of organochlorines, PBDEs, PAHs, polycyclic musks in livers of sea otters from several locations

| Region         | Location | wet wt/dry wt | ng/g          | ng/g          | ng/g          | ng/g          | ng/g         | ug/g          | ng/g           | ng/g          | ng/g ww     |              |
|----------------|----------|---------------|---------------|---------------|---------------|---------------|--------------|---------------|----------------|---------------|-------------|--------------|
|                |          |               | ww            | ww            | ww            | ww            | ww           | dw            | ww             | ww            | ng/g ww     |              |
|                |          |               | $\Sigma$ OCP  | $\Sigma$ PCB  | $\Sigma$ PBDE | $\Sigma$ PAH  | $\Sigma$ PFC | $\Sigma$ musk | $\Sigma$ metal | DDT           | HCHs        | CHLs         |
| CAL1           | Monterey |               | 4176.76       | 364.26        | 116.83        | 23.65         | 8.23         | 3.20          | 264.51         | 4112.76       | 7.80        | 56.20        |
| CAL2           | Monterey |               | 344.47        | 51.18         | 45.80         | 16.22         | 1.66         | 1.83          | 906.58         | 331.25        | 3.20        | 10.03        |
| CAL3           | Monterey |               | 253.10        | 26.37         | 4.19          | 10.69         | 8.02         | 2.23          | 276.90         | 243.46        | 1.69        | 7.95         |
| CAL4           | Monterey |               | 343.95        | 350.59        | 13.32         | 15.95         | 13.73        | 3.75          | 419.75         | 315.23        | 1.76        | 26.95        |
| CAL5           | Monterey |               | 1103.61       | 127.26        | 16.06         | 15.50         | 3.96         | 2.99          | 291.46         | 976.26        | 47.68       | 79.67        |
| CAL6           | Monterey |               | 8213.11       | 5622.36       | 181.89        | 22.61         | 5.74         | 12.78         | 293.75         | 7749.07       | 14.72       | 449.32       |
| <b>Average</b> |          |               | <b>2406</b>   | <b>1090</b>   | <b>63.0</b>   | <b>17.4</b>   | <b>6.9</b>   | <b>4.5</b>    | <b>408.8</b>   | <b>2288.0</b> | <b>12.8</b> | <b>105.0</b> |
| <b>SD</b>      |          |               | <b>2935</b>   | <b>2031</b>   | <b>65</b>     | <b>4</b>      | <b>4</b>     | <b>4</b>      | <b>228</b>     | <b>2792</b>   | <b>16</b>   | <b>156</b>   |
| WAS1           | Clallam  |               | 111.47        | 163.38        | 11.10         | 22.70         | 16.06        | 4.37          | 462.44         | 83.55         | 5.21        | 21.94        |
| WAS2           | Clallam  |               | 45.08         | 80.48         | 7.99          | 28.89         | 3.84         | 5.01          | 244.85         | 28.19         | 11.83       | 3.97         |
| WAS3           | Clallam  |               | 30.71         | 41.19         | 0.73          | 9.14          | 4.65         | 3.48          | 181.73         | 17.59         | 1.67        | 10.82        |
| WAS4           | Clallam  |               | 681.91        | 419.77        | 40.06         | 3.25          | 13.39        | 4.92          | NA             | 590.23        | 21.12       | 70.56        |
| WAS5           | Clallam  |               | 45.92         | 54.81         | 12.83         | 12.79         | 5.04         | 7.97          | NA             | 35.33         | 5.23        | 3.59         |
| WAS6           | Clallam  |               | 284.18        | 492.10        | 105.11        | 18.36         | 9.18         | 2.71          | NA             | 213.11        | 50.34       | 18.93        |
| <b>Average</b> |          |               | <b>199.9</b>  | <b>208.6</b>  | <b>29.64</b>  | <b>15.9</b>   | <b>8.69</b>  | <b>4.74</b>   | <b>296.3</b>   | <b>161.3</b>  | <b>15.9</b> | <b>21.6</b>  |
| <b>SD</b>      |          |               | <b>232.2</b>  | <b>180.3</b>  | <b>35.9</b>   | <b>8.5</b>    | <b>4.7</b>   | <b>1.7</b>    | <b>120.2</b>   | <b>202.9</b>  | <b>16.6</b> | <b>22.9</b>  |
| ALA1           | PWS      |               | 107.29        | 125.15        | 0.58          | 13.45         | 2.06         | 2.74          | 703.63         | 71.25         | 6.54        | 29.50        |
| ALA3           | PWS      |               | 235.56        | 457.16        | 38.41         | 49.16         | 2.58         | 7.64          | 451.86         | 164.38        | 5.12        | 64.56        |
| ALA5           | PWS      |               | 530.90        | 678.50        | 74.36         | 325.70        | 6.28         | 6.99          | NA             | 386.63        | 4.23        | 135.49       |
| <b>Average</b> |          |               | <b>291.25</b> | <b>420.27</b> | <b>37.79</b>  | <b>129.44</b> | <b>3.64</b>  | <b>5.79</b>   | <b>577.74</b>  | <b>207.42</b> | <b>5.30</b> | <b>76.52</b> |
| <b>SD</b>      |          |               | <b>177.37</b> | <b>227.40</b> | <b>30.12</b>  | <b>139.54</b> | <b>1.88</b>  | <b>2.17</b>   | <b>125.89</b>  | <b>132.30</b> | <b>0.95</b> | <b>44.09</b> |
| ALA2           | ADAK     |               | 8.93          | 6.25          | 0.30          | 15.81         | 0.51         | 2.25          | 128.49         | 3.80          | 2.55        | 2.32         |
| ALA4           | ADAK     |               | 154.53        | 769.82        | 22.19         | 37.30         | 12.46        | 6.92          | 326.77         | 126.00        | 11.80       | 16.00        |
| <b>Average</b> |          |               | <b>81.73</b>  | <b>388.04</b> | <b>11.24</b>  | <b>26.56</b>  | <b>6.49</b>  | <b>4.59</b>   | <b>227.63</b>  | <b>64.90</b>  | <b>7.18</b> | <b>9.16</b>  |
| <b>SD</b>      |          |               | <b>72.80</b>  | <b>381.79</b> | <b>10.95</b>  | <b>10.75</b>  | <b>5.97</b>  | <b>2.34</b>   | <b>99.14</b>   | <b>61.10</b>  | <b>4.63</b> | <b>6.84</b>  |
| RUS1           | KAM      |               | 21.37         | 26.56         | 0.47          | 5.65          | 1.67         | 4.14          | 206.75         | 13.25         | 2.46        | 4.23         |
| RUS2           | KAM      |               | 23.09         | 41.66         | 0.48          | 19.87         | 2.00         | 4.56          | 158.81         | 15.58         | 1.44        | 4.91         |
| RUS3           | KAM      |               | 11.87         | 15.26         | 0.50          | 31.15         | 3.31         | 6.21          | 170.82         | 7.21          | 0.65        | 3.29         |
| RUS4           | KAM      |               | 10.02         | 21.76         | 0.34          | 7.58          | 0.83         | 3.88          | 257.12         | 5.32          | 0.50        | 3.03         |
| RUS5           | KAM      |               | 24.16         | 32.23         | 0.88          | 5.12          | 1.47         | 10.52         | 151.88         | 11.78         | 4.18        | 5.16         |
| <b>Average</b> |          |               | <b>18.10</b>  | <b>27.49</b>  | <b>0.53</b>   | <b>13.88</b>  | <b>1.86</b>  | <b>5.86</b>   | <b>189.07</b>  | <b>10.63</b>  | <b>1.85</b> | <b>4.12</b>  |
| <b>SD</b>      |          |               | <b>5.94</b>   | <b>9.02</b>   | <b>0.18</b>   | <b>10.18</b>  | <b>0.82</b>  | <b>2.47</b>   | <b>38.92</b>   | <b>3.81</b>   | <b>1.36</b> | <b>0.85</b>  |
